# Supplementary material for: Pathogenic LRRK2 control of primary cilia and Hedgehog signaling in neurons and astrocytes of mouse brain
Source: eLife journal article supplement (doi:10.7554/elife.67900), 2021-10-18
Supplement: supp [file elife-67900-supp-v1.zip]

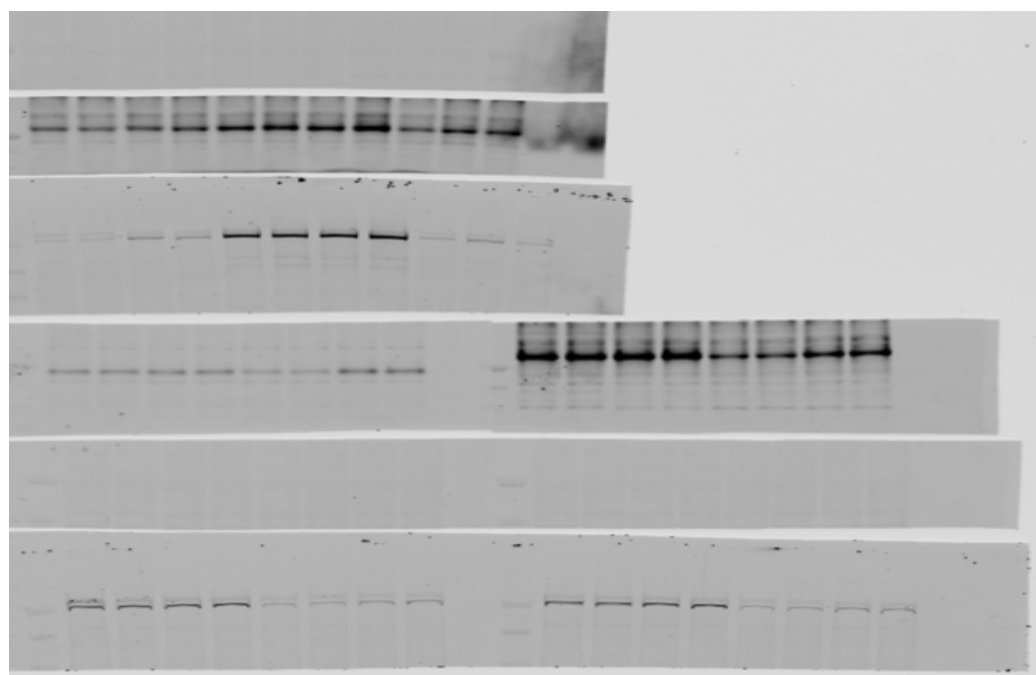

Rab12 pS105 4C

LRRK2pS935 4C

pRab10, pRab12 4A

LRRK2 pS935 4A

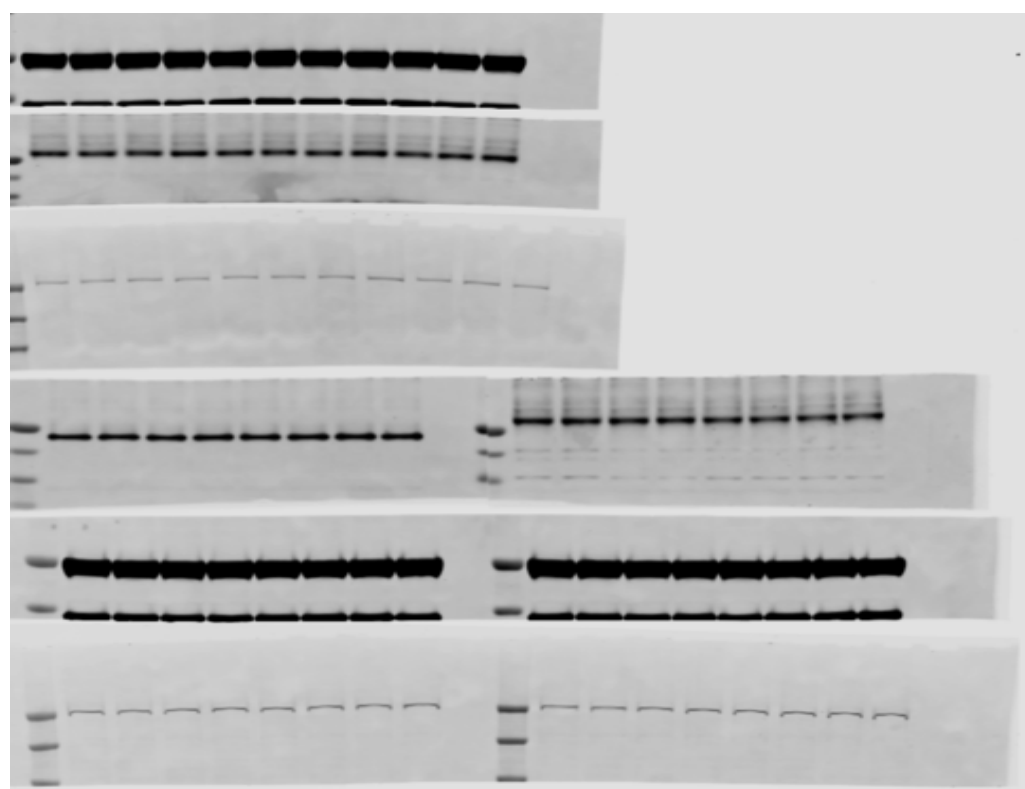

GAPDH not shown 4C

Total Rab12 4C

LRRK2 total 4C

Rab10 Rab12 total 4A

GAPDH not shown 4A

LRRK2 total 4A
