# Supplementary figures and images for: Pathogenic LRRK2 control of primary cilia and Hedgehog signaling in neurons and astrocytes of mouse brain
Source: eLife journal article supplement (doi:10.7554/elife.67900), 2021-10-18

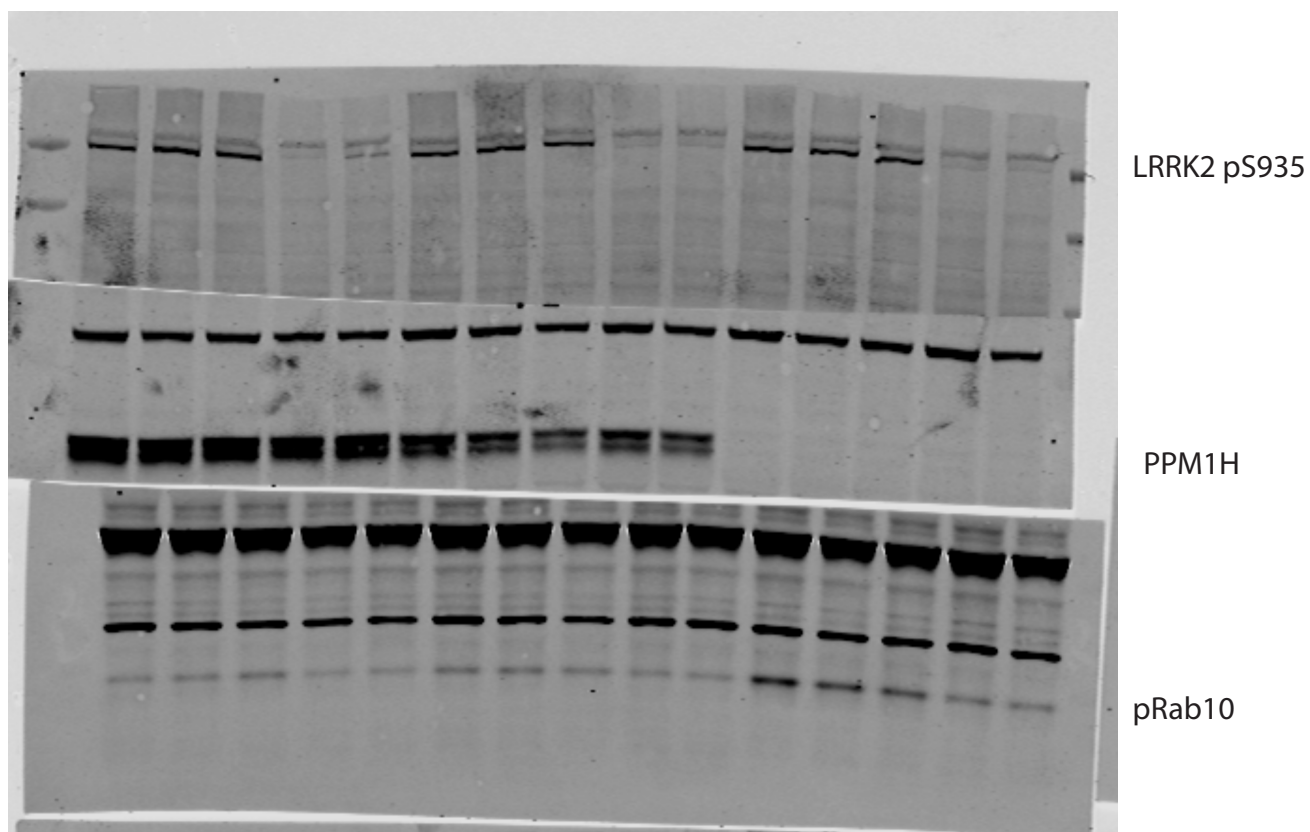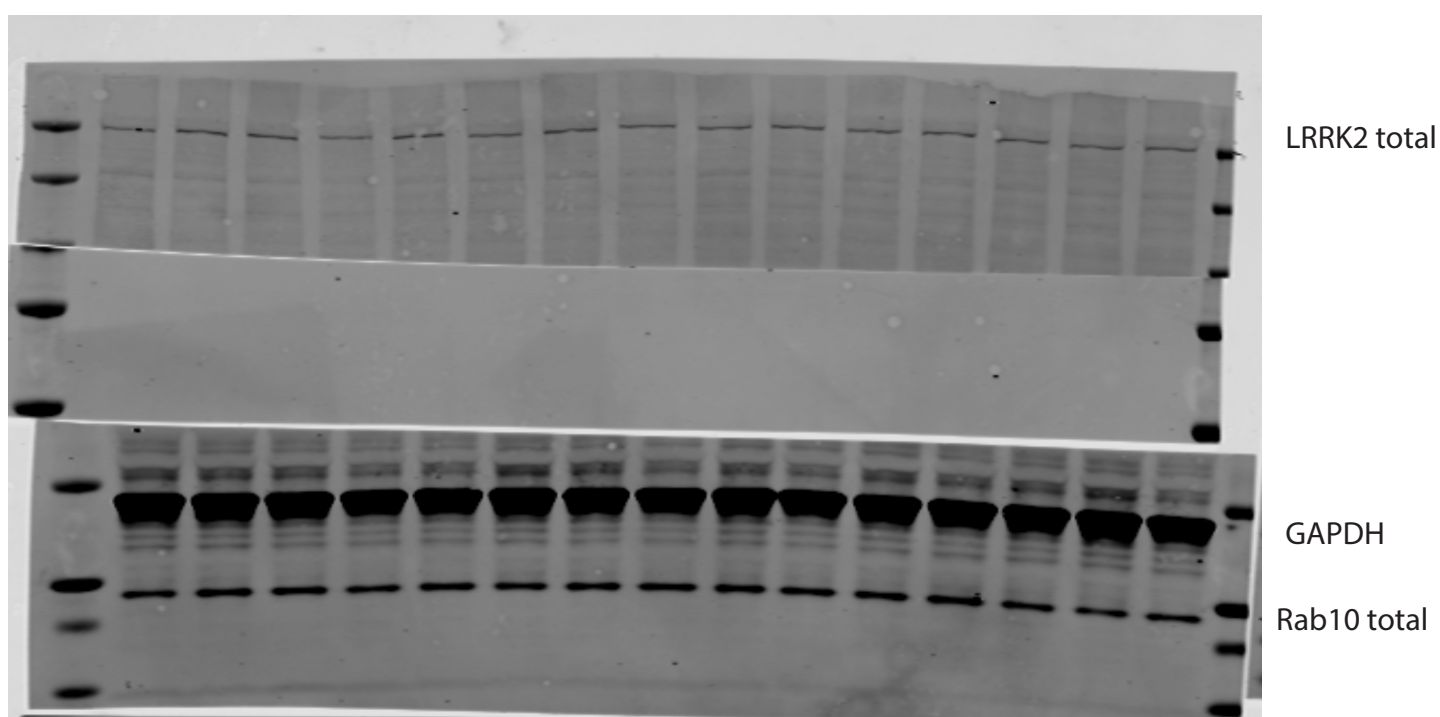

Supplement: supp [file elife-67900-supp-v1.zip]
